# Supplementary material for: Dietary Copper Deficiency Leads to Changes in Gene Expression Indicating an Increased Demand for NADH in the Prefrontal Cortex of the Rat’s Brain
Source: MDPI journal article supplement (doi:10.3390/ijms23126706), 2022-06-16
Supplement: s1 [file s1]

**Table S1.** Gene names and the results of real-time PCR analysis in all experimental groups, data presented as relative quantification  $\pm$  standard deviation.

| Gene name     | Cu <sub>salt</sub> |       |         | Cu <sub>D</sub>   |       |         | Cu <sub>MNP</sub> |       |         |
|---------------|--------------------|-------|---------|-------------------|-------|---------|-------------------|-------|---------|
|               | Mean $\pm$ RQ      | W     | P-value | Mean $\pm$ RQ     | W     | P-value | Mean $\pm$ RQ     | W     | P-value |
| <i>Hif1a</i>  | 1.024 $\pm$ 0.238  | 0.914 | 0.311   | 2.241 $\pm$ 0.191 | 0.955 | 0.728   | 1.149 $\pm$ 0.199 | 0.882 | 0.140   |
| <i>Myc</i>    | 1.008 $\pm$ 0.130  | 0.950 | 0.675   | 0.812 $\pm$ 0.130 | 0.893 | 0.089   | 0.572 $\pm$ 0.066 | 0.989 | 0.773   |
| <i>Slc2a1</i> | 1.011 $\pm$ 0.161  | 0.868 | 0.096   | 0.880 $\pm$ 0.103 | 0.891 | 0.176   | 0.904 $\pm$ 0.129 | 0.956 | 0.735   |
| <i>Hk2</i>    | 1.010 $\pm$ 0.151  | 0.947 | 0.627   | 1.692 $\pm$ 0.232 | 0.890 | 0.168   | 1.129 $\pm$ 0.258 | 0.905 | 0.247   |
| <i>Ldha</i>   | 1.029 $\pm$ 0.237  | 0.878 | 0.123   | 0.903 $\pm$ 0.055 | 0.904 | 0.245   | 0.935 $\pm$ 0.276 | 0.868 | 0.098   |
| <i>Pc</i>     | 1.005 $\pm$ 0.108  | 0.921 | 0.367   | 0.710 $\pm$ 0.114 | 0.927 | 0.417   | 0.798 $\pm$ 0.153 | 0.916 | 0.327   |
| <i>Mpc1</i>   | 1.006 $\pm$ 0.109  | 0.924 | 0.388   | 1.200 $\pm$ 0.073 | 0.899 | 0.211   | 1.331 $\pm$ 0.130 | 0.938 | 0.526   |
| <i>Pdk4</i>   | 1.010 $\pm$ 0.145  | 0.883 | 0.142   | 1.238 $\pm$ 0.086 | 0.895 | 0.190   | 1.273 $\pm$ 0.089 | 0.976 | 0.937   |
| <i>Mdh1</i>   | 1.029 $\pm$ 0.253  | 0.875 | 0.115   | 1.247 $\pm$ 0.105 | 0.929 | 0.438   | 1.344 $\pm$ 0.396 | 0.909 | 0.276   |
| <i>Idh2</i>   | 1.004 $\pm$ 0.096  | 0.886 | 0.152   | 1.099 $\pm$ 0.114 | 0.975 | 0.035   | 1.316 $\pm$ 0.359 | 0.889 | 0.167   |
| <i>Ppara</i>  | 1.009 $\pm$ 0.143  | 0.950 | 0.671   | 1.535 $\pm$ 0.152 | 0.957 | 0.756   | 1.148 $\pm$ 0.144 | 0.878 | 0.079   |
| <i>Me1</i>    | 1.011 $\pm$ 0.152  | 0.947 | 0.628   | 1.548 $\pm$ 0.122 | 0.932 | 0.467   | 1.053 $\pm$ 0.174 | 0.913 | 0.299   |
| <i>Cpt2</i>   | 1.008 $\pm$ 0.133  | 0.975 | 0.935   | 1.570 $\pm$ 0.130 | 0.927 | 0.419   | 0.663 $\pm$ 0.121 | 0.860 | 0.077   |
| <i>Sod2</i>   | 1.015 $\pm$ 0.179  | 0.937 | 0.519   | 2.343 $\pm$ 0.214 | 0.863 | 0.086   | 1.371 $\pm$ 0.347 | 0.848 | 0.093   |
| <i>Cat</i>    | 1.007 $\pm$ 0.121  | 0.866 | 0.088   | 3.072 $\pm$ 0.346 | 0.854 | 0.064   | 1.321 $\pm$ 0.069 | 0.953 | 0.699   |
| <i>Gls</i>    | 1.003 $\pm$ 0.085  | 0.985 | 0.986   | 3.201 $\pm$ 0.392 | 0.961 | 0.800   | 2.175 $\pm$ 0.609 | 0.897 | 0.204   |
| <i>Got2</i>   | 1.024 $\pm$ 0.238  | 0.866 | 0.090   | 3.052 $\pm$ 0.195 | 0.946 | 0.619   | 1.843 $\pm$ 0.286 | 0.924 | 0.593   |

RQ, relative quantification; SD, standard deviation; W, the result of Shapiro-Wilk test; P-value, normality data.

**Table S2.** The symbols and names of the genes, oligonucleotide sequences, GenBank reference sequence accession numbers and the lengths of amplicon (bp).

| Symbol of the gene | Name of the gene                       | Sequence (5' $\rightarrow$ 3') |                               | NCBI Reference Sequence |
|--------------------|----------------------------------------|--------------------------------|-------------------------------|-------------------------|
|                    |                                        | Forward                        | Reverse                       |                         |
| <i>Slc2a1</i>      | Solute Carrier Family 2 Member 1       | GCC TGA GAC CAG TTG<br>AAA GC  | GAG TGT CCG TGT<br>CTT CAG CA | NM_138827.1             |
| <i>Hk2</i>         | Hexokinase 2                           | CTC CAT CCC ACA GGA<br>GGT TA  | TGA GGA GGA TGC<br>TCT GGT CT | NM_012735.2             |
| <i>Pc</i>          | Pyruvate Carboxylase                   | GAG ATT GCC ATC CGA<br>GTG TT  | CTC CTT GGC CAC<br>CTT AAT GA | NM_012744.2             |
| <i>Gls1</i>        | Kidney-type glutaminase, mitochondrial | CAC ACA CAC GGA TTT<br>CTT GG  | GCC GAA GCT GAC<br>TTT GAA AC | NM_012569.2             |
| <i>Mpc1</i>        | Mitochondrial Pyruvate Carrier 1       | ACT TTC GCC CTC TGT<br>TGC TA  | GCA CTG TCC CTT<br>TCA AGA GC | NM_133561.1             |
| <i>Ldha</i>        | Lactate Dehydrogenase A                | GGT GGT TGA CAG TGC<br>ATA CG  | AGG ATA CAT GGG<br>ACG CTG AG | NM_017025.1             |
| <i>Pdk4</i>        | Pyruvate Dehydrogenase Kinase 4        | CCT TTG GCT GGT TTT<br>GGT TA  | CAC CAG TCA TCA<br>GCC TCA GA | NM_053551.1             |
| <i>Cpt2</i>        | Carnitine Palmitoyltransferase 2       | TCC TCG ATC AAG ATG<br>GGA AC  | GAT CCT TCA TCG<br>GGA AGT CA | NM_012930.1             |
| <i>Me1</i>         | Malic Enzyme 1                         | GCC CTG AAT ATG ATG<br>CGT TT  | CCT GGA ACA GCA<br>CTG TCT GA | NM_012600.2             |

|              |                                                     |                                   |                                  |                |
|--------------|-----------------------------------------------------|-----------------------------------|----------------------------------|----------------|
| <i>Ppara</i> | Peroxisome Proliferator<br>Activated Receptor Alpha | TCA CAC AAT GCA ATC<br>CGT TT     | GGC CTT GAC CTT<br>GTT CAT GT    | NM_013196.1    |
| <i>Cat</i>   | Catalase                                            | ACA TGG TCT GGG ACT<br>TCT GG     | CAA GTT TTT GAT<br>GCC CTG GT    | NM_012520.2    |
| <i>Sod2</i>  | Superoxide Dismutase 2                              | CAC TGT GGC TGA GCT<br>GTT GT     | TCC AAG CAA TTC<br>AAG CCT CT    | NM_017051.2    |
| <i>Got2</i>  | Glutamic-Oxaloacetic<br>Transaminase 2              | ACC ATC CAC TGC CGT<br>CTT AC     | TCT TGA AGG CTT<br>CGG TCA CT    | NM_013177.2    |
| <i>Mdh1</i>  | Malate Dehydrogenase 1                              | GAA GCC CTC AAA GAC<br>GAC AG     | CGA CAG GGA ACG<br>AGT AGA GC    | NM_033235.2    |
| <i>Idh2</i>  | Isocitrate Dehydrogenase<br>(NADP <sup>+</sup> ) 1  | CAG TCT GAC ATC CTG<br>GCT CA     | AGA TGC TGG CAA<br>TAG GGT TG    | NM_001014161.1 |
| <i>Myc</i>   | MYC Proto-Oncogene, BHLH<br>Transcription Factor    | CGA GCT GAA GCG TAG<br>CTT TT     | CTC GCC GTT TCC<br>TCA GTA AG    | NM_012603.2    |
| <i>Hif1a</i> | Hypoxia Inducible Factor 1<br>Subunit Alpha         | TCA AGT CAG CAA CGT<br>GGA AG     | TAT CGA GGC TGT<br>GTC GAC TG    | NM_024359.1    |
| <i>Rpl32</i> | Ribosomal Protein L32                               | AGA TTC AAG GGC CAG<br>ATC CT     | CGA TGG CTT TTC<br>GGT TCT TA    | NM_013226      |
| <i>Tbp</i>   | TATA box binding protein                            | CCT CTG AGA GCT CTG<br>GGA TTG TA | GCC AAG ATT CAC<br>GGT GGA TAC A | NM_001004198.1 |

---
